# Supplementary material
Source: Royal Society of Chemistry journal article supplement (doi:10.1039/d5fb00939a)
Supplement: d5fb00939a1.pdf [file d5fb00939a1.pdf]

## Supplementary Information

Table S1 Culture conditions for microorganisms

| Microorganism         | Broth                                  | Incubation Temperature |
|-----------------------|----------------------------------------|------------------------|
| <i>A. oryzae</i>      | Potato Dextrose Agar (PDA)             | 30 °C                  |
| <i>R. oligosporus</i> |                                        |                        |
| <i>S. cerevisiae</i>  | Yeast Peptone Dextrose (YPD) broth     | 30 °C                  |
| <i>B. subtilis</i>    | Luria-Bertani (LB) broth               | 30 °C                  |
| <i>L. plantarum</i>   | de Man, Rogosa, and Sharpe (MRS) broth | 37 °C                  |
| <i>L. sakei</i>       |                                        |                        |

Table S2 Free amino acids contents (mg/mL) of the fermented prawn juice using different microorganisms

| Amino Acids | AO          |            |            |            |            | RO         |            |            |            | SC         |            |            |            |
|-------------|-------------|------------|------------|------------|------------|------------|------------|------------|------------|------------|------------|------------|------------|
|             | D0          | D1         | D2         | D3         | D5         | D1         | D2         | D3         | D5         | D1         | D2         | D3         | D5         |
| PHE         | 0.19 ±0.002 | 0.18 ±0.01 | 0.20 ±0.01 | 0.26 ±0.02 | 0.23 ±0.01 | 0.19 ±0.01 | 0.20 ±0.02 | 0.28 ±0.04 | 0.35 ±0.01 | 0.22 ±0.03 | 0.19 ±0.01 | 0.25 ±0.02 | 0.25 ±0.02 |

Microbial-Dependent Variations in Umami Compounds during Fermentation of Prawn By-Products

|            |             |             |             |             |            |             |             |            |            |             |             |             |             |
|------------|-------------|-------------|-------------|-------------|------------|-------------|-------------|------------|------------|-------------|-------------|-------------|-------------|
| <b>LEU</b> | 0.31 ±0.01  | 0.30 ±0.004 | 0.32 ±0.02  | 0.39 ±0.03  | 0.29 ±0.18 | 0.31 ±0.02  | 0.32 ±0.01  | 0.38 ±0.08 | 0.37 ±0.23 | 0.32 ±0.04  | 0.30 ±0.02  | 0.37 ±0.02  | 0.26 ±0.13  |
| <b>ILE</b> | 0.17 ±0.01  | 0.17 ±0.003 | 0.18 ±0.01  | 0.21 ±0.01  | 0.22 ±0.02 | 0.18 ±0.004 | 0.17 ±0.01  | 0.25 ±0.04 | 0.29 ±0.05 | 0.20 ±0.01  | 0.16 ±0.01  | 0.20 ±0.01  | 0.19 ±0.02  |
| <b>MET</b> | 0.11 ±0.001 | 0.11 ±0.001 | 0.11 ±0.005 | 0.15 ±0.01  | 0.12 ±0.03 | 0.11 ±0.01  | 0.11 ±0.004 | 0.13 ±0.04 | 0.14 ±0.04 | 0.11 ±0.01  | 0.10 ±0.01  | 0.14 ±0.01  | 0.11 ±0.02  |
| <b>TYR</b> | 0.25 ±0.004 | 0.25 ±0.001 | 0.19 ±0.02  | 0.20 ±0.10  | 0.14 ±0.12 | 0.25 ±0.02  | 0.20 ±0.01  | 0.26 ±0.06 | 0.19 ±0.10 | 0.27 ±0.05  | 0.18 ±0.01  | 0.13 ±0.06  | ND          |
| <b>PRO</b> | 0.17 ±0.001 | 0.16 ±0.002 | 0.17 ±0.005 | 0.26 ±0.01  | 0.23 ±0.13 | 0.17 ±0.01  | 0.16 ±0.05  | 0.21 ±0.13 | 0.27 ±0.15 | 0.19 ±0.02  | 0.17 ±0.02  | 0.27 ±0.01  | 0.22 ±0.11  |
| <b>VAL</b> | 0.18 ±0.003 | 0.18 ±0.002 | 0.17 ±0.002 | 0.23 ±0.03  | 0.23 ±0.04 | 0.19 ±0.02  | 0.18 ±0.01  | 0.26 ±0.04 | 0.30 ±0.09 | 0.21 ±0.03  | 0.18 ±0.001 | 0.23 ±0.03  | 0.17 ±0.01  |
| <b>ALA</b> | 0.38 ±0.01  | 0.36 ±0.02  | 0.33 ±0.003 | 0.39 ±0.02  | 0.16 ±0.04 | 0.38 ±0.03  | 0.31 ±0.08  | 0.45 ±0.08 | 0.18 ±0.04 | 0.41 ±0.05  | 0.33 ±0.01  | 0.38 ±0.01  | 0.14 ±0.03  |
| <b>THR</b> | 0.15 ±0.003 | 0.15 ±0.003 | 0.14 ±0.01  | 0.20 ±0.01  | 0.14 ±0.02 | 0.16 ±0.01  | 0.15 ±0.01  | 0.2 ±0.03  | 0.19 ±0.03 | 0.16 ±0.02  | 0.13 ±0.004 | 0.16 ±0.01  | 0.10 ±0.002 |
| <b>GLY</b> | 0.28 ±0.002 | 0.27 ±0.01  | 0.24 ±0.01  | 0.37 ±0.03  | 0.22 ±0.15 | 0.27 ±0.03  | 0.25 ±0.004 | 0.27 ±0.24 | 0.26 ±0.23 | 0.31 ±0.05  | 0.24 ±0.01  | 0.38 ±0.02  | 0.20 ±0.16  |
| <b>SER</b> | 0.11 ±0.002 | 0.10 ±0.01  | 0.06 ±0.03  | 0.06 ±0.03  | 0.02 ±0.03 | 0.11 ±0.02  | 0.07 ±0.04  | 0.09 ±0.05 | 0.02 ±0.04 | 0.12 ±0.01  | 0.03 ±0.05  | 0.01 ±0.01  | ND          |
| <b>HIS</b> | 0.12 ±0.001 | 0.11 ±0.001 | 0.09 ±0.002 | 0.15 ±0.01  | 0.18 ±0.06 | 0.11 ±0.01  | 0.09 ±0.01  | 0.18 ±0.03 | 0.22 ±0.05 | 0.11 ±0.01  | 0.08 ±0.004 | 0.15 ±0.01  | 0.15 ±0.06  |
| <b>ARG</b> | 0.42 ±0.01  | 0.27 ±0.23  | 0.03 ±0.04  | ND          | ND         | 0.09 ±0.04  | 0.08 ±0.06  | ND         | ND         | 0.40 ±0.05  | 0.08 ±0.06  | ND          | ND          |
| <b>LYS</b> | 1.34 ±0.12  | 1.27 ±0.12  | 0.53 ±0.02  | 0.96 ±0.09  | 1.11 ±0.29 | 1.46 ±0.50  | 0.54 ±0.02  | 1.07 ±0.15 | 1.23 ±0.32 | 1.29 ±0.13  | 0.50 ±0.05  | 1.00 ±0.09  | 0.96 ±0.10  |
| <b>GLU</b> | 0.03 ±0.003 | 0.03 ±0.01  | 0.12 ±0.02  | 0.28 ±0.05  | 0.40 ±0.08 | 0.03 ±0.01  | 0.12 ±0.01  | 0.37 ±0.07 | 0.49 ±0.16 | 0.03 ±0.002 | 0.1 ±0.01   | 0.31 ±0.02  | 0.34 ±0.04  |
| <b>Cys</b> | ND          | 0.01 ±0.001 | 0.01 ±0.002 | 0.02 ±0.003 | 0.02 ±0.01 | 0.01 ±0.002 | 0.01 ±0.001 | 0.02 ±0.01 | 0.07 ±0.04 | 0.01 ±0.002 | 0.01 ±0.001 | 0.02 ±0.002 | 0.02 ±0.004 |
| <b>ASP</b> | 0.08 ±0.01  | 0.07 ±0.003 | 0.11 ±0.01  | 0.24 ±0.04  | 0.32 ±0.04 | 0.08 ±0.004 | 0.12 ±0.01  | 0.07 ±0.02 | 0.27 ±0.11 | 0.09 ±0.01  | 0.10 ±0.01  | 0.20 ±0.01  | 0.13 ±0.05  |

Microbial-Dependent Variations in Umami Compounds during Fermentation of Prawn By-Products

| Amino Acids | BS          |            |            |            | LP          |             |            |             | LS          |             |            |            |
|-------------|-------------|------------|------------|------------|-------------|-------------|------------|-------------|-------------|-------------|------------|------------|
|             | D1          | D2         | D3         | D5         | D1          | D2          | D3         | D5          | D1          | D2          | D3         | D5         |
| <b>PHE</b>  | 0.17 ±0.01  | 0.17 ±0.02 | 0.20 ±0.08 | 0.24 ±0.03 | 0.18 ±0.01  | 0.19 ±0.01  | 0.22 ±0.02 | 0.26 ±0.03  | 0.17 ±0.001 | 0.19 ±0.01  | 0.23 ±0.02 | 0.24 ±0.02 |
| <b>LEU</b>  | 0.28 ±0.02  | 0.28 ±0.01 | 0.35 ±0.05 | 0.31 ±0.16 | 0.29 ±0.02  | 0.31 ±0.02  | 0.40 ±0.08 | 0.40 ±0.03  | 0.28 ±0.01  | 0.30 ±0.02  | 0.35 ±0.02 | 0.37 ±0.03 |
| <b>ILE</b>  | 0.17 ±0.01  | 0.15 ±0.01 | 0.19 ±0.04 | 0.23 ±0.01 | 0.17 ±0.01  | 0.16 ±0.01  | 0.22 ±0.05 | 0.21 ±0.002 | 0.17 ±0.01  | 0.17 ±0.01  | 0.18 ±0.01 | 0.21 ±0.01 |
| <b>MET</b>  | 0.10 ±0.003 | 0.10 ±0.01 | 0.12 ±0.04 | 0.12 ±0.03 | 0.10 ±0.01  | 0.10 ±0.005 | 0.14 ±0.03 | 0.13 ±0.01  | 0.10 ±0.003 | 0.10 ±0.01  | 0.13 ±0.01 | 0.13 ±0.01 |
| <b>TYR</b>  | 0.22 ±0.01  | 0.17 ±0.01 | 0.19 ±0.05 | 0.15 ±0.13 | 0.22 ±0.02  | 0.18 ±0.01  | 0.25 ±0.01 | 0.24 ±0.02  | 0.21 ±0.01  | 0.17 ±0.03  | 0.19 ±0.05 | 0.17 ±0.04 |
| <b>PRO</b>  | 0.15 ±0.005 | 0.14 ±0.03 | 0.21 ±0.13 | 0.25 ±0.13 | 0.16 ±0.01  | 0.19 ±0.01  | 0.32 ±0.05 | 0.34 ±0.02  | 0.15 ±0.001 | 0.18 ±0.01  | 0.29 ±0.03 | 0.31 ±0.02 |
| <b>VAL</b>  | 0.17 ±0.01  | 0.18 ±0.02 | 0.21 ±0.03 | 0.17 ±0.01 | 0.18 ±0.01  | 0.17 ±0.002 | 0.20 ±0.02 | 0.25 ±0.02  | 0.17 ±0.01  | 0.16 ±0.001 | 0.18 ±0.02 | 0.19 ±0.03 |
| <b>ALA</b>  | 0.32 ±0.02  | 0.27 ±0.05 | 0.38 ±0.03 | 0.17 ±0.02 | 0.35 ±0.03  | 0.28 ±0.05  | 0.40 ±0.07 | 0.18 ±0.01  | 0.33 ±0.02  | 0.31 ±0.02  | 0.29 ±0.09 | 0.14 ±0.02 |
| <b>THR</b>  | 0.13 ±0.003 | 0.12 ±0.01 | 0.17 ±0.04 | 0.14 ±0.02 | 0.15 ±0.01  | 0.14 ±0.01  | 0.17 ±0.02 | 0.17 ±0.02  | 0.14 ±0.01  | 0.15 ±0.01  | 0.17 ±0.01 | 0.14 ±0.01 |
| <b>GLY</b>  | 0.24 ±0.02  | 0.22 ±0.01 | 0.25 ±0.19 | 0.2 ±0.17  | 0.25 ±0.02  | 0.24 ±0.01  | 0.38 ±0.07 | 0.32 ±0.02  | 0.24 ±0.01  | 0.23 ±0.01  | 0.33 ±0.02 | 0.30 ±0.02 |
| <b>SER</b>  | 0.08 ±0.01  | 0.06 ±0.03 | 0.07 ±0.03 | ND         | 0.06 ±0.01  | 0.06 ±0.01  | 0.03 ±0.01 | 0.06 ±0.02  | 0.07 ±0.002 | 0.04 ±0.02  | ND         | ND         |
| <b>HIS</b>  | 0.09 ±0.01  | 0.08 ±0.01 | 0.16 ±0.04 | 0.16 ±0.04 | 0.09 ±0.004 | 0.06 ±0.003 | 0.14 ±0.03 | 0.13 ±0.01  | 0.09 ±0.003 | 0.07        | 0.13 ±0.02 | 0.13 ±0.01 |

Microbial-Dependent Variations in Umami Compounds during Fermentation of Prawn By-Products

|            | ±0.004      |             |            |            |             |             |             |             |             |             |             |             |
|------------|-------------|-------------|------------|------------|-------------|-------------|-------------|-------------|-------------|-------------|-------------|-------------|
| <b>ARG</b> | 0.32 ±0.05  | 0.20 ±0.11  | 0.23 ±0.16 | 0.10 ±0.12 | 0.32 ±0.04  | 0.26 ±0.03  | 0.40 ±0.05  | 0.37 ±0.02  | ND          | ND          | ND          | ND          |
| <b>LYS</b> | 1.00 ±0.15  | 0.47 ±0.01  | 1.00 ±0.18 | 1.03 ±0.11 | 1.10 ±0.17  | 0.39 ±0.05  | 1.02 ±0.38  | 1.11 ±0.12  | 0.88 ±0.10  | 0.44 ±0.05  | 0.83 ±0.12  | 0.95 ±0.07  |
| <b>GLU</b> | 0.03 ±0.001 | 0.10 ±0.03  | 0.28 ±0.07 | 0.33 ±0.05 | 0.03 ±0.001 | 0.10 ±0.004 | 0.32 ±0.01  | 0.34 ±0.03  | 0.03 ±0.001 | 0.09 ±0.01  | 0.29 ±0.05  | 0.37 ±0.01  |
| <b>Cys</b> | 0.01 ±0.002 | 0.01 ±0.001 | 0.01 ±0.01 | 0.01 ±0.01 | ND          | ND          | 0.01 ±0.003 | 0.01 ±0.002 | 0.01 ±0.001 | 0.01 ±0.001 | 0.02 ±0.002 | 0.02 ±0.001 |
| <b>ASP</b> | 0.07 ±0.01  | 0.09 ±0.001 | 0.18 ±0.02 | 0.22 ±0.02 | 0.07 ±0.01  | 0.11 ±0.01  | 0.26 ±0.03  | 0.34 ±0.02  | 0.06 ±0.003 | 0.11 ±0.01  | 0.22 ±0.01  | 0.30 ±0.02  |

\*N = 3 fermentation trials

\*Mean values ± standard deviation

\*Ala – alanine, Arg – arginine, Asp – Aspartic acid, Cys – Cystine, Glu – glutamic acid, Gly – glycine, His – histidine, Ile – Isoleucine, Leu – leucine, Lys – lysine,

Met – methionine, Phe – phenylalanine, Pro – proline, Ser – serine, Thr – threonine, Tyr – Tyrosine, Val – valine

\*ND (not detected, < limit of quantification)

## Microbial-Dependent Variations in Umami Compounds during Fermentation of Prawn By-Products

\*AO – *Aspergillus oryzae*, RO – *Rhizopus oligosporus*, SC – *Saccharomyces cerevisiae*, BS – *Bacillus subtilis*, LP – *Lactiplantibacillus plantarum*, LS –

*Latilactobacillus sakei*

## Microbial-Dependent Variations in Umami Compounds during Fermentation of Prawn By-Products
